# Supplementary material for: Juvenile fish assemblages in temperate rocky reefs are shaped by the presence of macro-algae canopy and its three-dimensional structure
Source: PubMed Central journal article supplement (PMC5676688; doi:10.1038/s41598-017-15291-y), 2017-11-07
Supplement: 41598_2017_15291_MOESM1_ESM.pdf [file 41598_2017_15291_MOESM1_ESM.pdf]

**Title:**

Juvenile fish assemblages in temperate rocky reefs are shaped by the presence of macro-algae canopy and its three-dimensional structure

**Contributors:**

Adrien Cheminée, Jérémy Pastor, Olivier Bianchimani, Pierre Thiriet, Enric Sala, Jean-Michel Cottalorda, Jean-Marie Dominici, Pierre Lejeune and Patrice Francour

**Supplementary information file**

Note : for each PERMANOVA, table of results gives degrees of freedom (df), Mean Squares (MS), calculated pseudo-F, and P-values (P). P-values were obtained by 999 permutations of residuals under a reduced model (perm) or through Monte Carlo test (MC, see methods).

**Supplementary Table S1. PERMANOVA table of results: juvenile richness among *Cystoseira* forests**

| Source of variation | df  | MS      | Pseudo-F | P(perm) |
|---------------------|-----|---------|----------|---------|
| Depth de            | 1   | 0,48676 | 0,16633  | 0,709   |
| Volume vo           | 1   | 5,2055  | 3,4788   | 0,087   |
| Locality lo         | 1   | 3,8197  | 2,0892   | 0,169   |
| Zone zo(lo)         | 6   | 1,8869  | 2,2136   | 0,125   |
| Site si(zo(lo))     | 12  | 0,86249 | 1,4921   | 0,119   |
| Residuals           | 118 | 0,57805 |          |         |
| Total               | 139 |         |          |         |

**P-values were obtained by 999 permutations of residuals under a reduced model**

**Supplementary Table S2. PERMANOVA table of results: juvenile total abundance among *Cystoseira* forests**

| Source of variation | df  | MS     | Pseudo-F | P(perm) |
|---------------------|-----|--------|----------|---------|
| Depth de            | 1   | 251,85 | 1,6055   | 0,268   |
| Volume vo           | 1   | 771,56 | 2,4098   | 0,133   |
| Locality lo         | 1   | 14,52  | 4,04E-02 | 0,845   |
| Zone zo(lo)         | 6   | 359,68 | 0,81394  | 0,578   |
| Site si(zo(lo))     | 12  | 449    | 1,8162   | 0,044   |
| Residuals           | 118 | 247,22 |          |         |
| Total               | 139 |        |          |         |

**P-values were obtained by 999 permutations of residuals under a reduced model**

**Supplementary Table S3. PERMANOVA tables of results for taxa-specific juveniles abundance among *Cystoseira* forests**

**a. *Symphodus* spp. juvenile abundance among *Cystoseira* forests**

| Source of variation | df  | MS     | Pseudo-F | P(perm) |
|---------------------|-----|--------|----------|---------|
| Depth de            | 1   | 1191.5 | 13.194   | 0.017   |
| Volume vo           | 1   | 828.85 | 18.886   | 0.001   |
| Locality lo         | 1   | 119.81 | 2.9295   | 0.125   |
| Zone zo(lo)         | 6   | 37.725 | 0.4261   | 0.876   |
| Site si(zo(lo))     | 12  | 90.816 | 3.4957   | 0.001   |
| Residuals           | 118 | 25.979 |          |         |
| Total               | 139 |        |          |         |

**b. *Coris julis* juveniles abundance among *Cystoseira* forests**

| Source of variation | df  | MS      | Pseudo-F | P(perm) |
|---------------------|-----|---------|----------|---------|
| Depth de            | 1   | 0.21433 | 9.40E-02 | 0.767   |
| Volume vo           | 1   | 2.408   | 4.5152   | 0.044   |
| Locality lo         | 1   | 3.5597  | 10.474   | 0.018   |
| Zone zo(lo)         | 6   | 0.32149 | 0.51952  | 0.768   |
| Site si(zo(lo))     | 12  | 0.62669 | 1.5555   | 0.096   |
| Residuals           | 118 | 0.40288 |          |         |
| Total               | 139 |         |          |         |

**c. Blenniidae-Gobiidae-Tripterygiidae juveniles abundance among *C.* forests**

| Source of variation | df  | MS      | Pseudo-F | P(perm) |
|---------------------|-----|---------|----------|---------|
| Depth de            | 1   | 2.0976  | 5.1751   | 0.075   |
| Volume vo           | 1   | 4.8674  | 8.8188   | 0.004   |
| Locality lo         | 1   | 0.25092 | 0.33872  | 0.566   |
| Zone zo(lo)         | 6   | 0.77441 | 3.6673   | 0.031   |
| Site si(zo(lo))     | 12  | 0.20824 | 0.71471  | 0.755   |
| Residuals           | 118 | 0.29137 |          |         |
| Total               | 139 |         |          |         |

**P-values were obtained by 999 permutations of residuals under a reduced model**

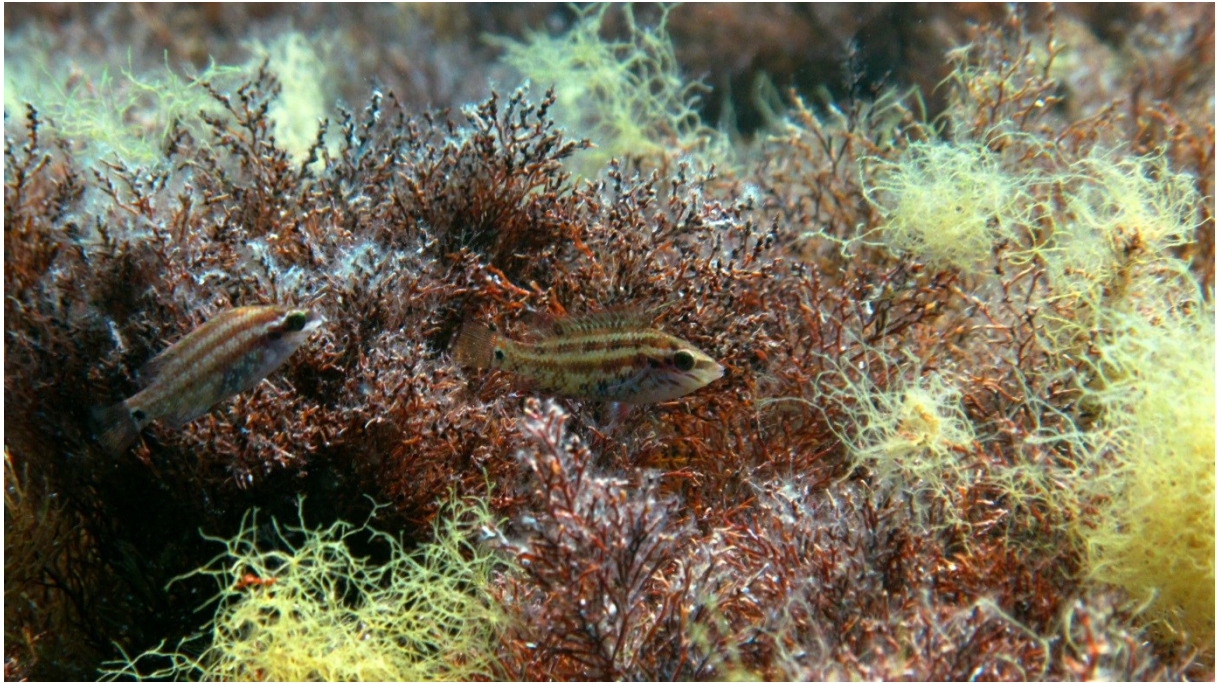

**Supplementary Figure S4.** *Symphodus roissali* juveniles (about 45 mm TL) among a *Cystoseira brachycarpa* var. *balearica* forest (3m depth, La Revellata Bay, Corsica, July 16<sup>th</sup> 2010). Picture by Adrien Cheminée.

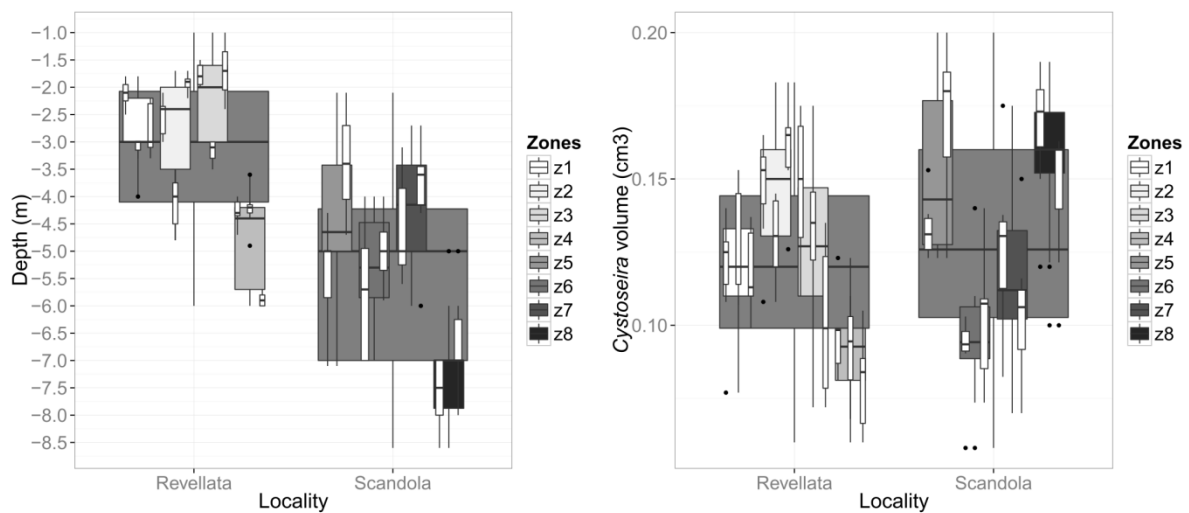

**Supplementary Figure S5.** Tuckey boxplots of *Cystoseira* forest descriptors: Depth (meters) and volume (cm<sup>3</sup>) – boxes of different shapes display levels of factors locality (Revellata vs Scandola), zones (z1 to z8, in scale of greys) and sites (white filled boxes). Box plots indicate the median (bold line near the center), the first and third quartile (the box), the extreme values where distance from the box is at most 1.5 times the inter quartile range (whiskers), and remaining outliers (dark circles).

a. Juvenile total density per locality, zone and site

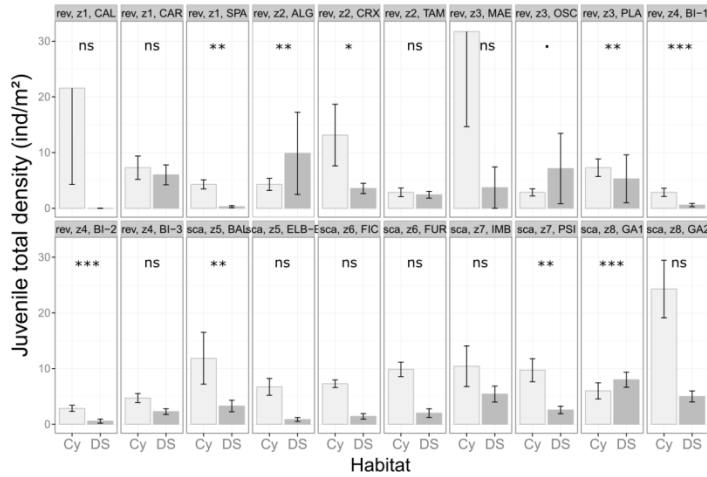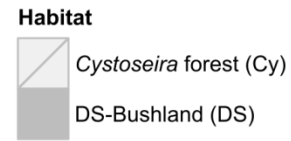

b. Juvenile richness per locality and zone

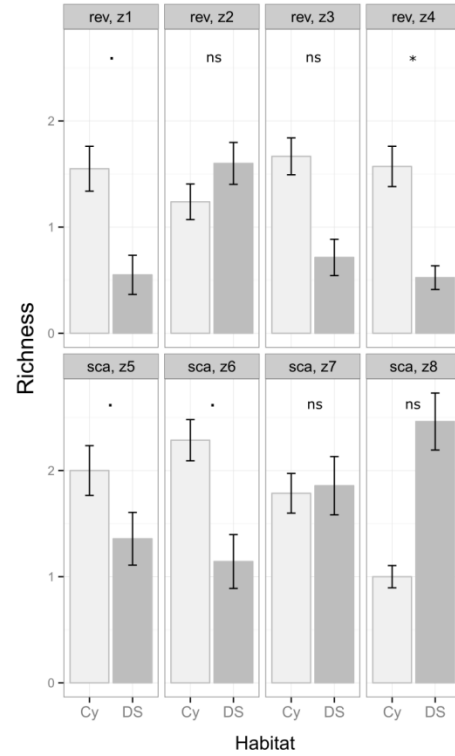

c. Juvenile richness per locality, zone and site

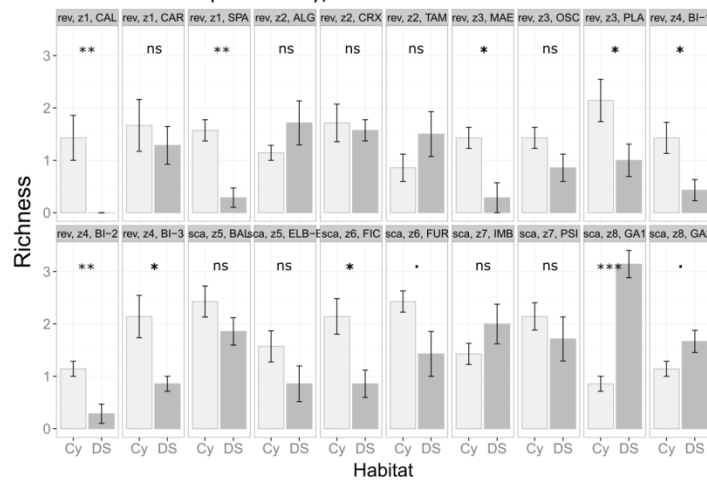

**Supplementary Figure S6.** Barplots of juvenile total density and richness within both studied

habitats: *C. balearica* forests (Cy) and Dictyotales-Sphacelariales (DS) bushland. Mean and standard

error (error bars) are given. (a) Habitat term for total density in each of the 20 sites among our study

zones (z1 to z8) from both localities (Revellata “rev” and Scandola “sca”). (b) & (c) Habitat term for

richness in each zone and site (see Fig. 1). Pairwise test results are given (“ns”: not significant; “.”:  $P <$

0.1; “\*”:  $P < 0.05$ ; “\*\*”:  $P < 0.01$ ; “\*\*\*”:  $P < 0.001$ .). P-values were obtained by 999 permutations of

residuals under a reduced model.

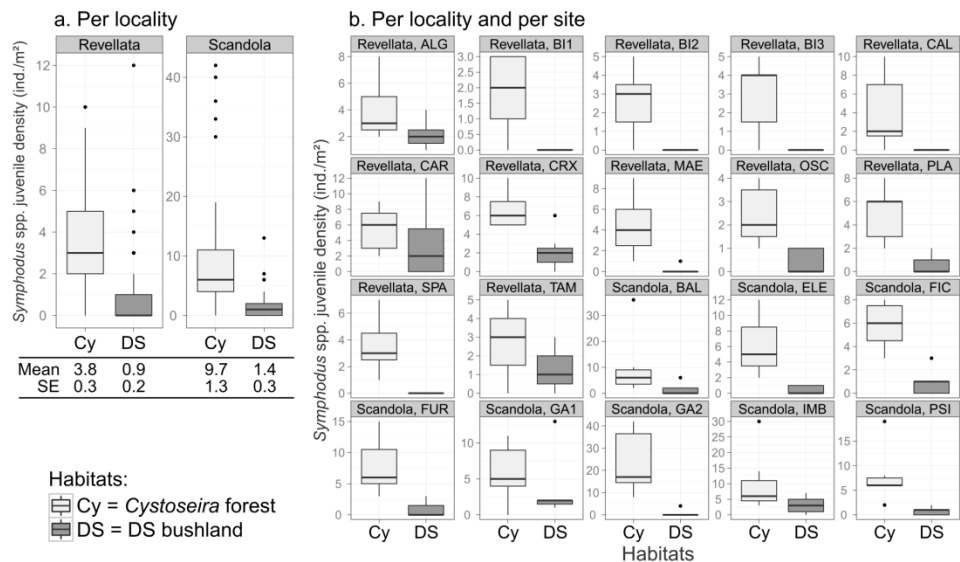

**Supplementary Figure S7.** Tuckey boxplots of *Symphodus* spp. densities within both studied habitats. (a) Habitat term for both localities (see PERMANOVAs results in the text), means and standard errors (SE) are given. (b) Habitat term for each site per locality (see sites localization on Fig. 1). Density differences between habitat levels were systematically significant (all pair-wise tests:  $P < 0.05$ ). Box plots indicate the median (bold line near the center), the first and third quartile (the box), the extreme values where distance from the box is at most 1.5 times the inter quartile range (whiskers) and remaining outliers (dark circles).
